# Supplementary material for: Anion-assisted amidinium exchange and metathesis
Source: Royal Society of Chemistry journal article supplement (doi:10.1039/d2cc03425e), 2022-01-01
Supplement: d2cc03425e1.pdf [file d2cc03425e1.pdf]

## Electronic supplementary information

# **Anion-assisted amidinium exchange and metathesis**

Oleg Borodin,<sup>a</sup> Yevhenii Shchukin,<sup>a</sup> Jonas Schmid,<sup>a</sup> and Max von Delius<sup>a</sup>

*a) Institute of Organic Chemistry, Ulm University, Albert-Einstein-Allee 11, 89081 Ulm, Germany.*

E-Mail: [max.vondelius@uni-ulm.de](mailto:max.vondelius@uni-ulm.de)

# Contents

|          |                                                                       |           |
|----------|-----------------------------------------------------------------------|-----------|
| <b>1</b> | <b>General methods and abbreviations</b>                              | <b>2</b>  |
| <b>2</b> | <b>Synthesis of amidinium salts</b>                                   | <b>3</b>  |
| <b>3</b> | <b>Amidinium exchange: substrate and solvent scope</b>                | <b>4</b>  |
| 3.1      | General procedure . . . . .                                           | 4         |
| 3.2      | Amidinium exchange with FA-BPh <sub>4</sub> : solvent scope . . . . . | 5         |
| 3.3      | Substrate scope . . . . .                                             | 8         |
| 3.4      | Amidinium exchange with FA-OAc: solvent scope . . . . .               | 8         |
| <b>4</b> | <b>Amidinium metathesis</b>                                           | <b>11</b> |
| 4.1      | General procedure . . . . .                                           | 11        |
| 4.2      | Effect of the primary amine amount on the metathesis rate . . . . .   | 12        |
| 4.3      | Effect of anions on the metathesis rate . . . . .                     | 13        |
| <b>5</b> | <b>NMR spectra</b>                                                    | <b>17</b> |
|          | <b>References</b>                                                     | <b>18</b> |

# 1 General methods and abbreviations

All commercially available reagents and solvents were purchased from Sigma Aldrich, Alfa Aesar, ACROS Organics, TCI, Fluorochem or VWR and were used without further purification. NMR spectra were recorded on Bruker Avance 400 ( $^1\text{H}$ : 400 MHz;  $^{13}\text{C}$ : 101 MHz) spectrometers at room temperature and referenced to the residual solvent peak ( $^1\text{H}$ :  $\text{CDCl}_3$ , 7.26 ppm;  $\text{CD}_3\text{CN}$ , 1.94 ppm,  $\text{DMSO-}d_6$ , 2.50 ppm;  $\text{CD}_2\text{Cl}_2$ , 5.32 ppm;  $^{13}\text{C}$ :  $\text{CDCl}_3$ , 77.16 ppm;  $\text{CD}_3\text{CN}$ , 1.32 ppm,  $\text{DMSO-}d_6$ , 39.52 ppm,  $\text{CD}_2\text{Cl}_2$ , 53.84 ppm). Chemical shifts ( $\delta$ ) are denoted in ppm. High-resolution mass spectra were recorded on an Agilent QTOF 6546 mass spectrometer (ESI, positive polarity; solvent: acetonitrile).

## LCMS reaction monitoring

All samples for LCMS analysis were prepared by diluting 1-3  $\mu\text{L}$  of the analyzed solution (e.g., a reaction mixture) in 1 mL of LCMS-grade acetonitrile. This extent of dilution was sufficient to stop (or significantly slow down) dynamic covalent exchange in order to reliably quantify the analytes by HPLC. LCMS analysis of amidinium exchange and metathesis was performed on Shimadzu LCMS-2020 using Ascentis® C8 HPLC column (10 cm  $\times$  4.6 mm, particle size – 3  $\mu\text{m}$ ) or Kinetex® C18 HPLC column (10 cm  $\times$  4.6 mm, particle size – 2.6  $\mu\text{m}$ ). Ascentis® C8 HPLC column was used for all samples containing *N,N'*-di(4-methylbenzyl)formamidinium (**1bb**).

**HPLC method.** Isocratic elution was applied using: a) 94% mobile phase B and 6% mobile phase A at 50 °C and flow rate 1.0 mL/min (for Kinetex® C18 HPLC column) and b) 96% mobile phase B and 4% mobile phase A at 50 °C and flow rate 1.0 mL/min (for Ascentis® C8 HPLC column). Mobile phase A: 0.023 M  $\text{HCO}_2\text{NH}_4$  and 0.0019 M  $\text{HCO}_2\text{H}$  in  $\text{H}_2\text{O}$ . Mobile phase B: acetonitrile. HPLC monitoring was performed with a photodiode array detector at  $\lambda = 220$  nm.

## List of abbreviations

|                               |                                                 |
|-------------------------------|-------------------------------------------------|
| BArF                          | tetrakis[3,5-bis(trifluoromethyl)-phenyl]borate |
| BnNH <sub>2</sub>             | benzylamine                                     |
| BPh <sub>4</sub> <sup>-</sup> | tetraphenylborate                               |
| DMSO                          | dimethyl sulfoxide                              |
| eq.                           | equivalents                                     |
| EtOAc                         | ethyl acetate                                   |
| HPLC                          | high-performance liquid chromatography          |
| LCMS                          | liquid chromatography – mass spectrometry       |
| MeCN                          | acetonitrile                                    |
| OAc                           | acetate                                         |
| PhMe                          | toluene                                         |
| r.t.                          | room temperature                                |
| THF                           | tetrahydrofuran                                 |

## 2 Synthesis of amidinium salts

Amidinium salts **1aa**·BPh<sub>4</sub>, **1cc**·BArF, **1dd**·BPh<sub>4</sub>, and **FA**·BPh<sub>4</sub> were synthesized according to previously published procedures.[1]

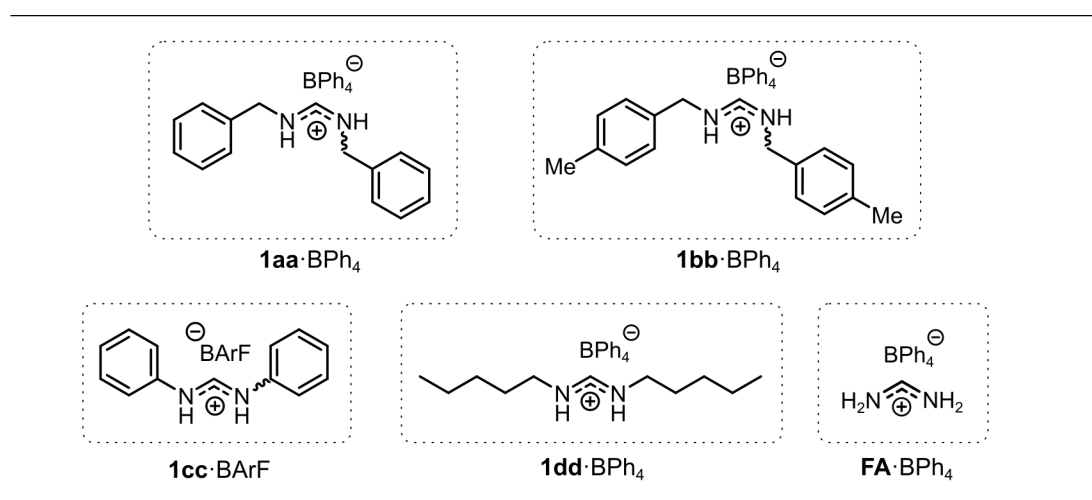

Figure S1: Amidinium salts used in the present work

### N,N'-di(4-methylbenzyl)formamidinium tetraphenylborate (**1bb**·BPh<sub>4</sub>)

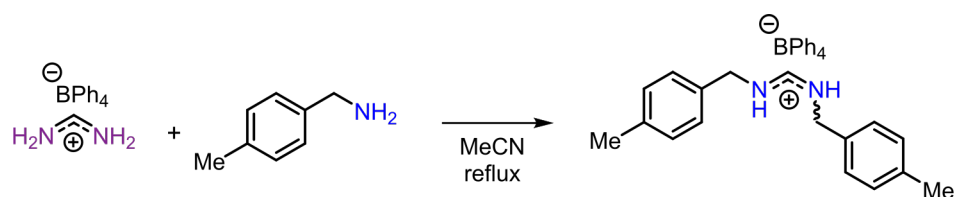

Formamidinium tetraphenylborate (**FA**·BPh<sub>4</sub>) (0.3 mmol, 1.0 eq.) was dissolved in MeCN (4 mL), and 4-methylbenzylamine (0.8 mmol, 2.8 eq.) was added to the solution. The reaction mixture was stirred under reflux for 30 min and all volatiles were then removed under reduced pressure. The residue was re-dissolved in MeCN (0.75 mL) and PhMe (7.5 mL) was added to the mixture. The solution was kept at +4 °C overnight and the resulting crystals were filtered off to afford the desired products **1bb**·BPh<sub>4</sub> as colorless crystals (0.10 g, 0.17 mmol, 65%). For preparation of the analytically pure sample (without traces of 4-methylbenzylamine), the product was recrystallized twice by dissolving it in the minimal volume of MeCN/CH<sub>2</sub>Cl<sub>2</sub> mixture (1:1) and adding 5-10 fold volume of PhMe.

**<sup>1</sup>H NMR** (400 MHz, CD<sub>3</sub>CN, 295 K)\* δ 7.69 (s, 1H, CH amidinium), 7.33 – 7.11 (m, 16H, CH Ar: BPh<sub>4</sub> + amidinium Ph), 7.00 (t, *J* = 7.44 Hz, 8H, CH Ar BPh<sub>4</sub>), 6.85 (t, *J* = 7.20 Hz, 4H, CH Ar BPh<sub>4</sub>), 4.48 (s, 2H, CH<sub>2</sub> benzylic *E,Z*), 4.43 (bs, 4H, CH<sub>2</sub> benzylic *E,E*), 4.35 (s, 2H, CH<sub>2</sub> benzylic *E,Z*), 2.34 (s, 6H, CH<sub>3</sub>).

\*The NMR spectrum contains both isomers of the product – *E,Z* and *E,E*. The integrals of each isomer specified in parentheses are treated independently.

**<sup>13</sup>C NMR** (101 MHz, CD<sub>3</sub>CN, 298 K) δ 164.80 (q, <sup>1</sup>*J*<sub>B-C</sub> = 49.28 Hz, C Ar BPh<sub>4</sub>), 155.71, 139.44, 139.36, 136.72 (q, *J* = 1.40 Hz, C Ar BPh<sub>4</sub>), 133.43, 131.57, 130.52, 130.43, 128.86, 128.61, 126.62 (q, *J* = 2.69 Hz, C Ar BPh<sub>4</sub>), 122.79 (C Ar BPh<sub>4</sub>), 51.45, 46.46, 21.15.

**HRMS:** *m/z* 253.16993 [M+H]<sup>+</sup> (calculated for C<sub>17</sub>H<sub>21</sub>N<sub>2</sub><sup>+</sup> 253.17080).

### 3 Amidinium exchange: substrate and solvent scope

#### 3.1 General procedure

A 1.5 mL HPLC vial was charged with a formamidinium salt (40  $\mu\text{mol}$ )\* and 1,2,4,5-tetramethylbenzene (as an internal HPLC standard). The mixture was dissolved in LCMS-grade MeCN (800  $\mu\text{L}$ ) and benzylamine (2.0 eq., 80  $\mu\text{mol}$ ) was rapidly added to the stirred solution via a Hamilton<sup>TM</sup> syringe. The reaction progress was monitored by LCMS. Amounts of  $\text{BnNH}_2$ , **1a** and **1aa** (in mol% with respect to the initial amount of the starting formamidinium salts) were determined using the internal standard (calibration curves from Figure S2 were used).

\*In case of formamidinium acetate, 48  $\mu\text{mol}$  was used and all other reagent and solvent quantities were scaled proportionally.

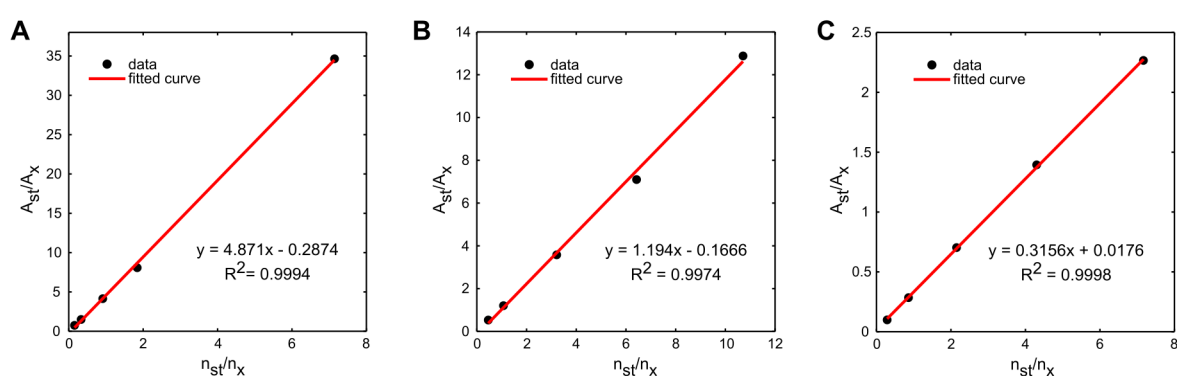

**Figure S2:** HPLC calibration curves for (A) benzylamine, (B) *N*-benzylformamidinium, (C) *N,N'*-dibenzylformamidinium (**1aa**). Internal standard – 1,2,4,5-tetramethylbenzene.  $n_{\text{st}}/n_x$  – molar ratio between the standard and the calibrated compound;  $A_{\text{st}}/A_x$  – ratio of chromatographic peak areas of the standard and the calibrated compound. For benzylamine, calibration curves varied depending on the HPLC method (possibly, due to different content of an acidic buffer used, which affected the degree of protonation of  $\text{BnNH}_2$  and thus its molar absorptivity); therefore, the curve was updated whenever a new HPLC method was applied.

### 3.2 Amidinium exchange with FA-BPh<sub>4</sub>: solvent scope

**Table S1:** Solvent scope of the amidinium exchange between **FA-BPh<sub>4</sub>** and **BnNH<sub>2</sub>**. Reaction conditions: 50 mM **FA-BPh<sub>4</sub>**, 100 mM **BnNH<sub>2</sub>**, room temperature.

| Entry | Solvent                                         | Equilibration time <sup>a</sup> , min | Equilibrium composition <sup>b</sup><br>amine:1a:1aa, mol% |
|-------|-------------------------------------------------|---------------------------------------|------------------------------------------------------------|
| 1     | DMSO                                            | 70                                    | 49:19:57                                                   |
| 2     | MeCN                                            | 40                                    | 40:21:62                                                   |
| 3     | MeOH                                            | >250                                  | 60:36:47 <sup>c</sup>                                      |
| 4     | EtOH                                            | >250                                  | 54:28:49 <sup>c</sup>                                      |
| 5     | <i>i</i> PrOH                                   | >250                                  | 65:38:47 <sup>c</sup>                                      |
| 6     | pyridine                                        | 50                                    | 55:28:47                                                   |
| 7     | THF                                             | 70                                    | 50:27:56                                                   |
| 8     | EtOAc                                           | 40                                    | 40:14:65                                                   |
| 9     | THF/H <sub>2</sub> O (20% v/v H <sub>2</sub> O) | 150                                   | 74:33:33                                                   |

<sup>a</sup> The time when all kinetic curves reach the plateau region (meaning that the concentrations of the monitored species do not significantly change anymore).

<sup>b</sup> Composition of the mixture once the equilibrium is reached (at any time > equilibration time).

<sup>c</sup> Composition of the mixture at t = 250 min (not fully equilibrated mixture).

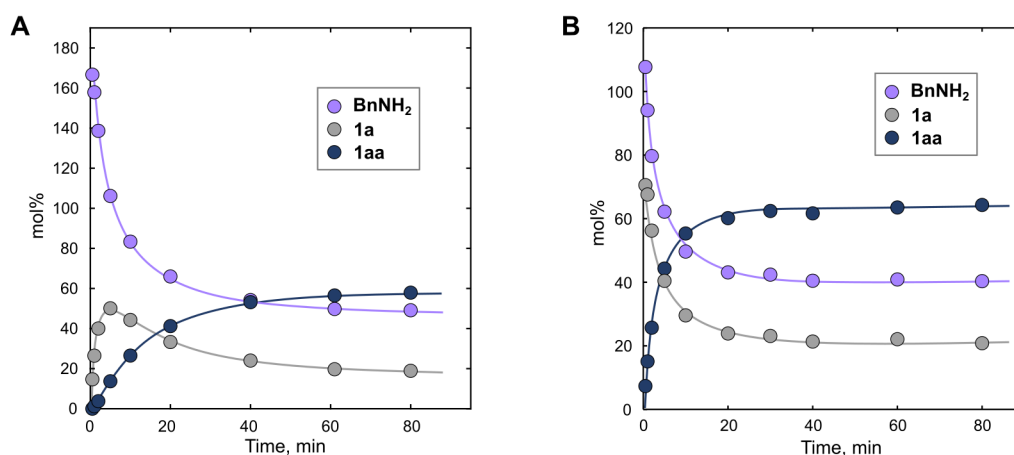

**Figure S3:** Kinetic plots of the amidinium exchange between **FA-BPh<sub>4</sub>** and benzylamine in (A) DMSO and (B) MeCN. Reaction conditions: 1.0 eq. **FA-BPh<sub>4</sub>** (40  $\mu$ mol), 2.0 eq. **BnNH<sub>2</sub>** (80  $\mu$ mol), solvent – 800  $\mu$ L, r.t. Relative amounts of **BnNH<sub>2</sub>**, **1a**, and **1aa** (mol%) were calculated with respect to the initial amount of **FA-BPh<sub>4</sub>**. The lines are shown to guide the eye.

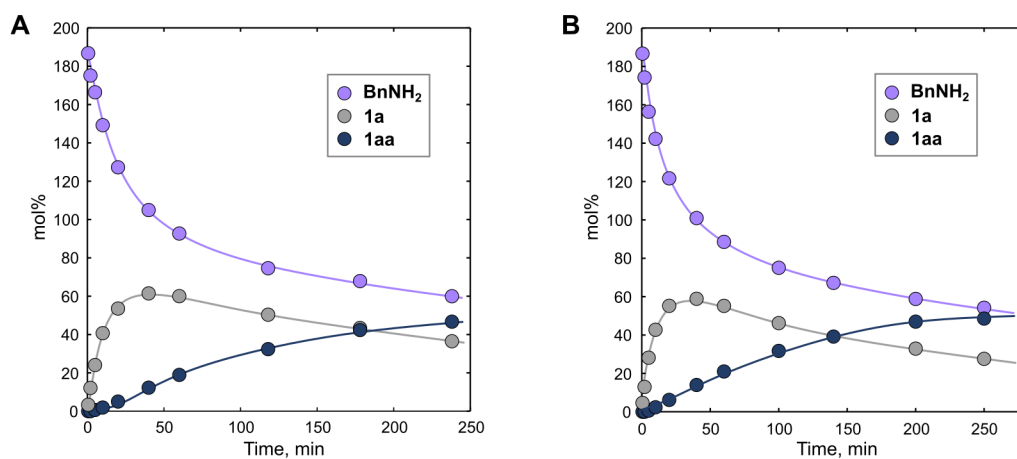

**Figure S4:** Kinetic plots of the amidinium exchange between **FA-BPh<sub>4</sub>** and benzylamine in (A) MeOH and (B) EtOH. Reaction conditions: 1.0 eq. **FA-BPh<sub>4</sub>** (40  $\mu$ mol), 2.0 eq. **BnNH<sub>2</sub>** (80  $\mu$ mol), solvent – 800  $\mu$ L, r.t. Relative amounts of **BnNH<sub>2</sub>**, **1a**, and **1aa** (mol%) were calculated with respect to the initial amount of **FA-BPh<sub>4</sub>**. The lines are shown to guide the eye.

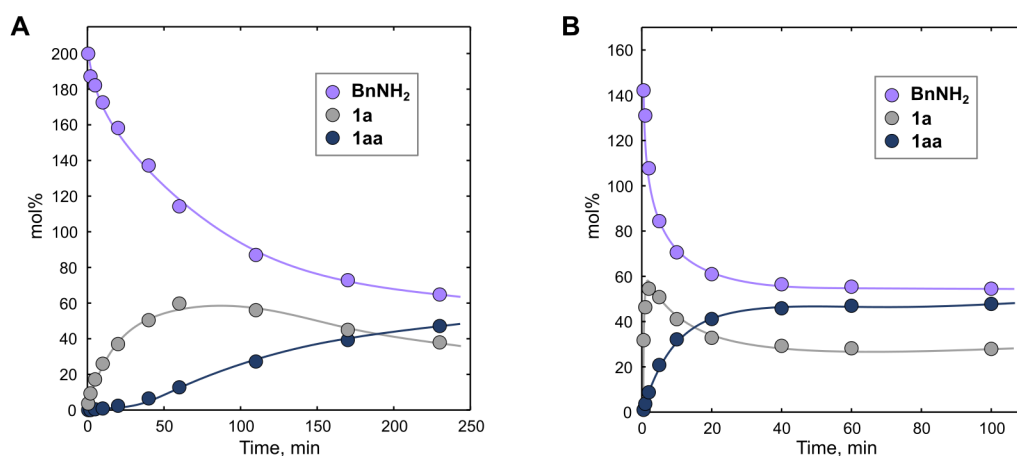

**Figure S5:** Kinetic plots of the amidinium exchange between **FA-BPh<sub>4</sub>** and benzylamine in (A) *i*PrOH and (B) pyridine. Reaction conditions: 1.0 eq. **FA-BPh<sub>4</sub>** (40  $\mu$ mol), 2.0 eq. **BnNH<sub>2</sub>** (80  $\mu$ mol), solvent – 800  $\mu$ L, r.t. Relative amounts of **BnNH<sub>2</sub>**, **1a**, and **1aa** (mol%) were calculated with respect to the initial amount of **FA-BPh<sub>4</sub>**. The lines are shown to guide the eye.

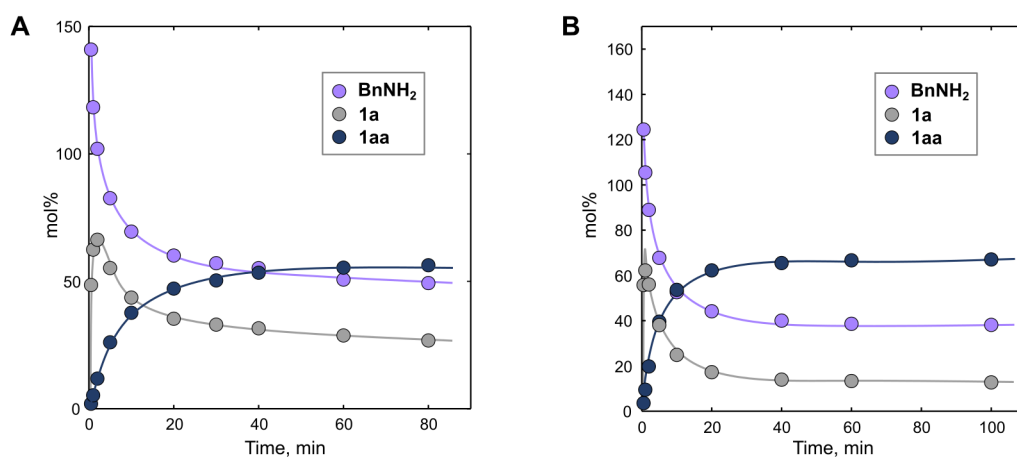

**Figure S6:** Kinetic plots of the amidinium exchange between **FA-BPh<sub>4</sub>** and benzylamine in (A) THF and (B) EtOAc. Reaction conditions: 1.0 eq. **FA-BPh<sub>4</sub>** (40  $\mu$ mol), 2.0 eq. **BnNH<sub>2</sub>** (80  $\mu$ mol), solvent – 800  $\mu$ L, r.t. Relative amounts of **BnNH<sub>2</sub>**, **1a**, and **1aa** (mol%) were calculated with respect to the initial amount of **FA-BPh<sub>4</sub>**. The lines are shown to guide the eye.

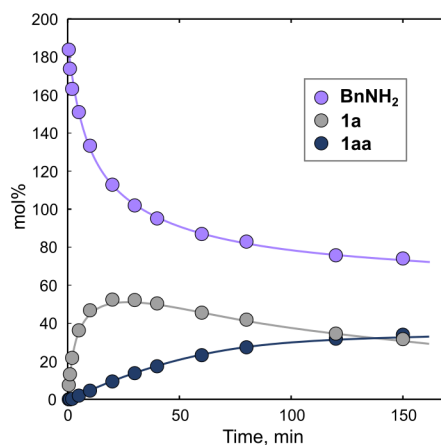

**Figure S7:** Kinetic plots of the amidinium exchange between **FA-BPh<sub>4</sub>** and benzylamine in THF/H<sub>2</sub>O (20% v/v H<sub>2</sub>O). Reaction conditions: 1.0 eq. **FA-BPh<sub>4</sub>** (40  $\mu$ mol), 2.0 eq. **BnNH<sub>2</sub>** (80  $\mu$ mol), solvent (total volume) – 800  $\mu$ L, r.t. Relative amounts of **BnNH<sub>2</sub>**, **1a**, and **1aa** (mol%) were calculated with respect to the initial amount of **FA-BPh<sub>4</sub>**. The lines are shown to guide the eye.



### 3.3 Substrate scope

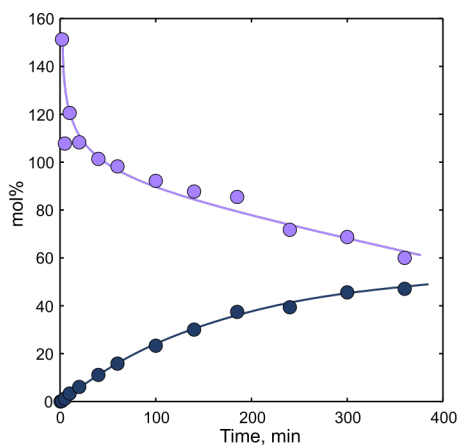

**Figure S8:** Kinetic plot of the amidinium exchange between benzylamine and **1cc**·BPh<sub>4</sub>. Reaction conditions: 1.0 eq. **1cc**·BPh<sub>4</sub> (40 μmol), 2.0 eq. **BnNH<sub>2</sub>** (80 μmol), solvent – MeCN (800 μL), r.t. The reaction was monitored by LCMS. Legend: violet – **BnNH<sub>2</sub>**, dark blue – **1aa**. The lines are shown to guide the eye.

### 3.4 Amidinium exchange with FA-OAc: solvent scope

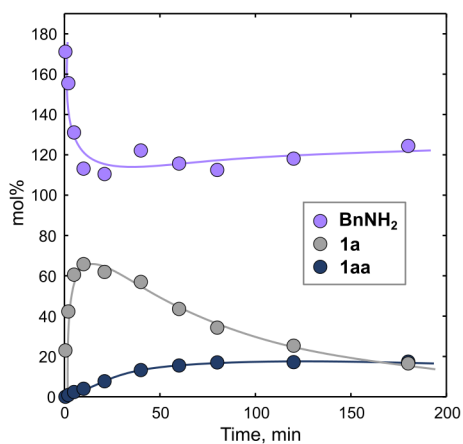

**Figure S9:** Kinetic plots of the amidinium exchange between **FA-OAc** and benzylamine in pure H<sub>2</sub>O. Reaction conditions: 1.0 eq. **FA-OAc** (48 μmol), 2.0 eq. **BnNH<sub>2</sub>** (96 μmol), solvent – 960 μL, r.t. The reaction was monitored by LCMS. The lines are shown to guide the eye.

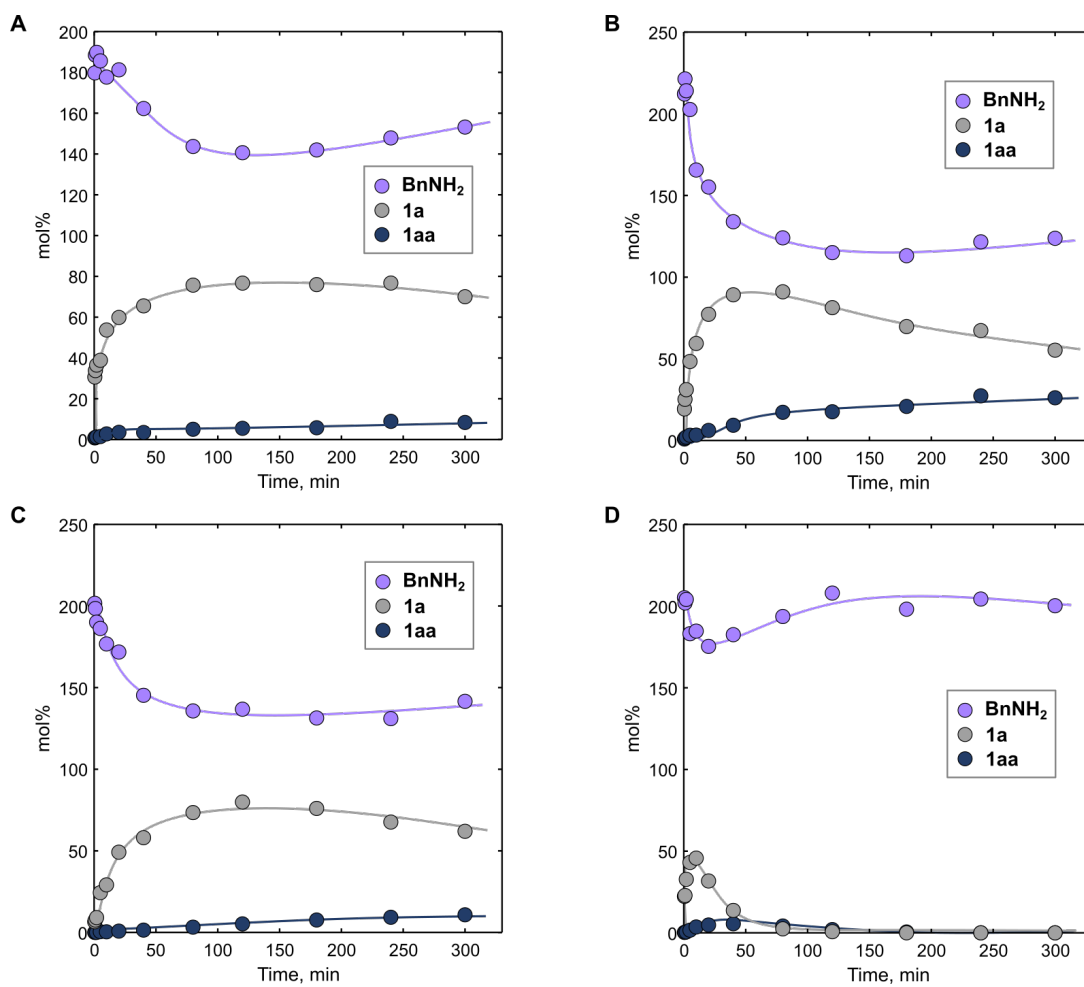

**Figure S10:** Kinetic plots of the amidinium exchange between **FA-OAc** and benzylamine in H<sub>2</sub>O at different pH: A) 5.5 (acetate buffer, 0.2 M); B) 7.5 (phosphate buffer, 0.2 M); C) 9.5 (borate buffer, 0.2 M); D) 11.5 (phosphate buffer, 0.2 M). Reaction conditions: 1.0 eq. **FA-OAc** (50 μmol), 2.0 eq. **BnNH<sub>2</sub>** (100 μmol), solvent – 2000 μL, r.t. The lines are shown to guide the eye.

**Table S2:** Solvent scope of the amidinium exchange between **FA-OAc** and **BnNH<sub>2</sub>** in organic solvents. Reaction conditions: 50 mM **FA-OAc**, 100 mM **BnNH<sub>2</sub>**, room temperature.

| Entry | Solvent                                         | Equilibration time <sup>a</sup> , min | Equilibrium composition <sup>b</sup><br>amine: <b>1a</b> : <b>1aa</b> , mol% |
|-------|-------------------------------------------------|---------------------------------------|------------------------------------------------------------------------------|
| 1     | DMSO                                            | 80                                    | 42:28:55                                                                     |
| 2     | MeOH                                            | >220                                  | 43:38:51 <sup>c</sup>                                                        |
| 3     | <i>i</i> PrOH                                   | 200                                   | 46:34:54                                                                     |
| 4     | THF/H <sub>2</sub> O (20% v/v H <sub>2</sub> O) | 140                                   | 62:31:43                                                                     |

<sup>a</sup> The time when all kinetic curves reach the plateau region (meaning that the concentrations of the monitored species do not significantly change anymore).

<sup>b</sup> Composition of the mixture once the equilibrium is reached (at any time > equilibration time).

<sup>c</sup> Composition of the mixture at t = 223 min (not fully equilibrated mixture).

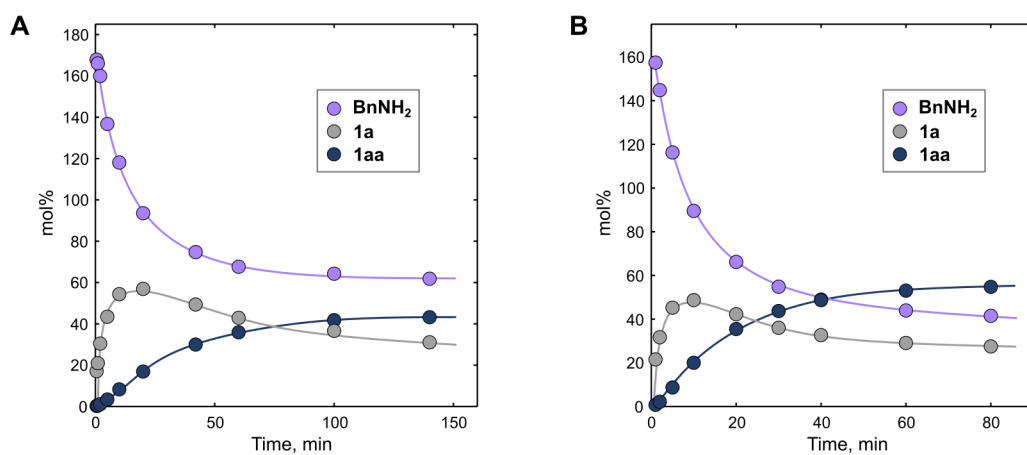

**Figure S11:** Kinetic plots of the amidinium exchange between **FA-OAc** and benzylamine in (A) THF/H<sub>2</sub>O (20% v/v H<sub>2</sub>O) and (B) DMSO. Reaction conditions: 1.0 eq. **FA-OAc** (48 μmol), 2.0 eq. **BnNH<sub>2</sub>** (96 μmol), solvent – 960 μL, r.t. The reactions were monitored by LCMS. The lines are shown to guide the eye.

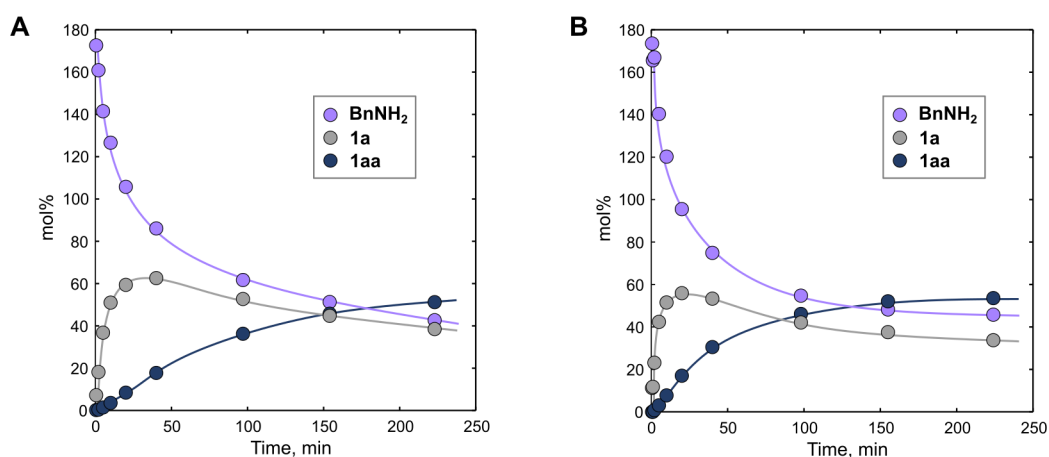

**Figure S12:** Kinetic plots of the amidinium exchange between **FA-OAc** and benzylamine in (A) MeOH and (B) *i*-PrOH. Reaction conditions: 1.0 eq. **FA-OAc** (48 μmol), 2.0 eq. **BnNH<sub>2</sub>** (96 μmol), solvent – 960 μL, r.t. The reactions were monitored by LCMS. The lines are shown to guide the eye.

## 4 Amidinium metathesis

### 4.1 General procedure

A 1.5 mL HPLC vial was charged with 1,2,4,5-tetramethylbenzene (as an internal HPLC standard) and equimolar amounts (10  $\mu\text{mol}$  each) of amidinium  $\text{BPh}_4^-$  salts **1aa** and **1bb** (as stock solutions in MeCN). A stock solution of **BnNH<sub>2</sub>** in MeCN (56 mM; 0 – 0.10 eq. with respect to the total amount of the amidinium species) was then added. When it was necessary, a stock solution of a tetrabutylammonium salt in MeCN (515 mM; 0 – 1.0 eq. with respect to the total amount of the amidinium species) was subsequently added. The total volume of the reaction mixture (400  $\mu\text{L}$ ) was adjusted with MeCN (in fact, this amount of solvent was added to the HPLC vial prior to addition of the reactants). The reaction progress was monitored by LCMS. The amount of **1aa** was determined using the internal standard (the calibration curve from Fig. S2,C was applied). The amount of **1bb** was determined from the HPLC peak area multiplied by a factor which equalized the area of the peaks of **1aa** and **1bb** at  $t = 0$  h (the first HPLC measurement where product **1ab** was not yet formed; equality of the amounts of **1aa** and **1bb** was assured by quantitative NMR of the used stock solutions). Amount of **1ab** was determined from the HPLC peak area assuming that molar absorptivity of **1ab** was a mean of the molar absorptivities of **1aa** and **1bb**. Relative amounts of **1aa**, **1bb**, and **1ab** (mol%) were calculated with respect to the initial amount of either **1aa** or **1bb** (which were used as an equimolar mixture).

## 4.2 Effect of the primary amine amount on the metathesis rate

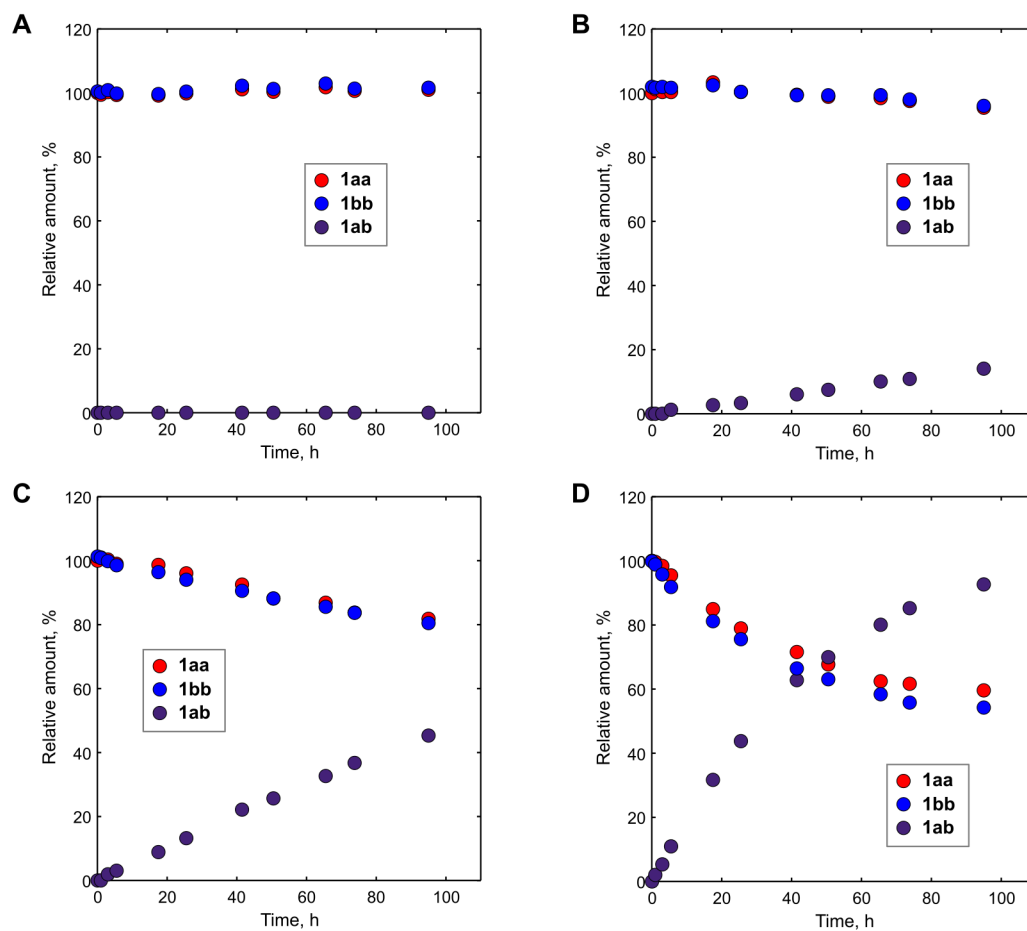

**Figure S13:** Kinetic plots of the amidinium metathesis between **1aa** and **1bb** in the presence of different amounts of  $\text{BnNH}_2$ : A) 0 mol%; B) 2.5 mol%; C) 5 mol%; D) 10 mol% (with respect to the total amount of the amidinium species). Reaction conditions: 1.0 eq. **1aa** (10  $\mu\text{mol}$ ), 1.0 eq. **1bb** (10  $\mu\text{mol}$ ), 0 – 0.2 eq.  $\text{BnNH}_2$  (0–2  $\mu\text{mol}$ ), solvent – MeCN (total volume – 400  $\mu\text{L}$ ), r.t.

### 4.3 Effect of anions on the metathesis rate

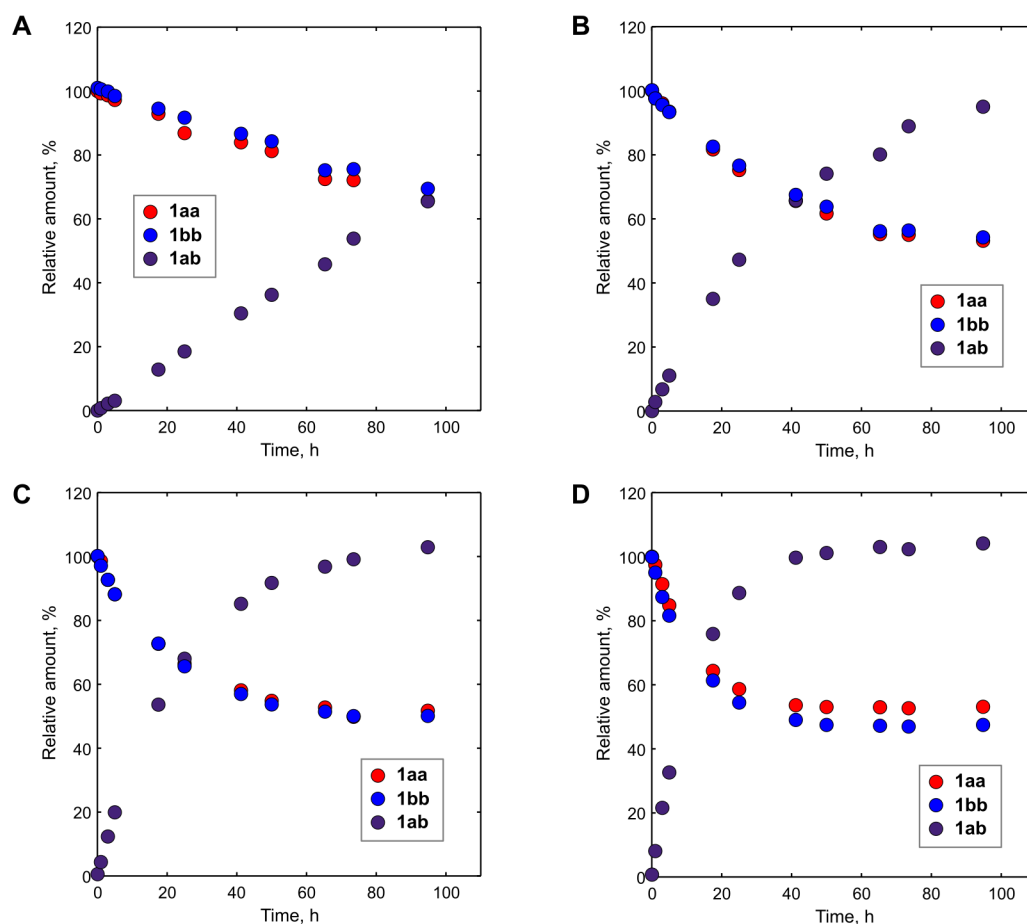

**Figure S14:** Kinetic plots of the amidinium metathesis between **1aa** and **1bb** in the presence of 100 mol% NBu<sub>4</sub>OAc and varying amounts of **BnNH<sub>2</sub>**: A) 0 mol%; B) 2.5 mol%; C) 5 mol%; D) 10 mol% (all relative quantities are with respect to the total amount of the amidinium species). Reaction conditions: 1.0 eq. **1aa** (10 μmol), 1.0 eq. **1bb** (10 μmol), 0–0.2 eq. **BnNH<sub>2</sub>** (0–2 μmol), 2.0 eq. NBu<sub>4</sub>OAc (20 μmol), solvent – MeCN (total volume – 400 μL), r.t. **Comment:** the metathesis reaction containing 0.05% H<sub>2</sub>O (50 mol% with respect to the total amount of the amidinium species) did not take place *in the absence* of both **BnNH<sub>2</sub>** and NBu<sub>4</sub>OAc. This disproves the hypothesis that the residual water from NBu<sub>4</sub>OAc was the sole reason for the observed metathesis in case of (A). It is, however, possible that AcO<sup>−</sup> catalyzes both the hydrolysis reaction and the amidinium exchange (see Fig. 3 in the main text). Therefore, we wondered if varying the water content in the reaction mixture while keeping the concentration of AcO<sup>−</sup> fixed would affect the metathesis rate (Figure S15).

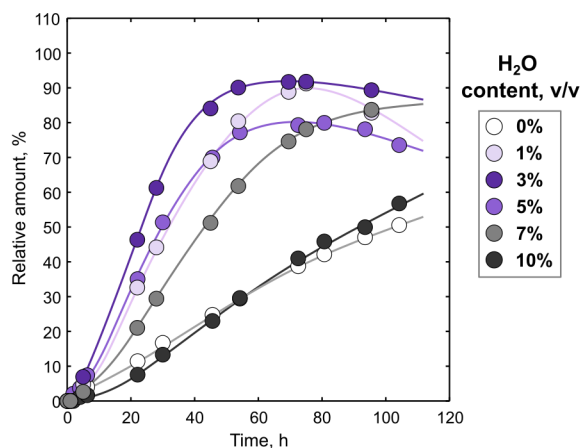

**Figure S15:** Kinetic plots of the amidinium metathesis between **1aa** and **1bb** in the presence of 100 mol% NBu<sub>4</sub>OAc (with respect to the total amount of the amidinium species) and varying amounts of water. The lines are shown to guide the eye. Reaction conditions: 1.0 eq. **1aa** (10 μmol), 1.0 eq. **1bb** (10 μmol), 2.0 eq. NBu<sub>4</sub>OAc (20 μmol), solvent – MeCN/H<sub>2</sub>O (total volume – 400 μL), r.t. **Comment:** Even 1% (v/v) of water significantly increased the rate of the metathesis. This result indicates that AcO<sup>-</sup> might facilitate hydrolysis of the starting materials which, in turn, leads to release of free benzylamines that drive the metathesis. Therefore, even without addition of extra **BnNH<sub>2</sub>**, the metathesis could take place in non-anhydrous MeCN in the presence of AcO<sup>-</sup> (Fig. S14,A). Large amounts of water (>7% v/v) reduced the observed rate enhancement, possibly, for the same reasons as for the amidinium exchange in aqueous or alcoholic solvents (see Table S1 and discussion in the main text).

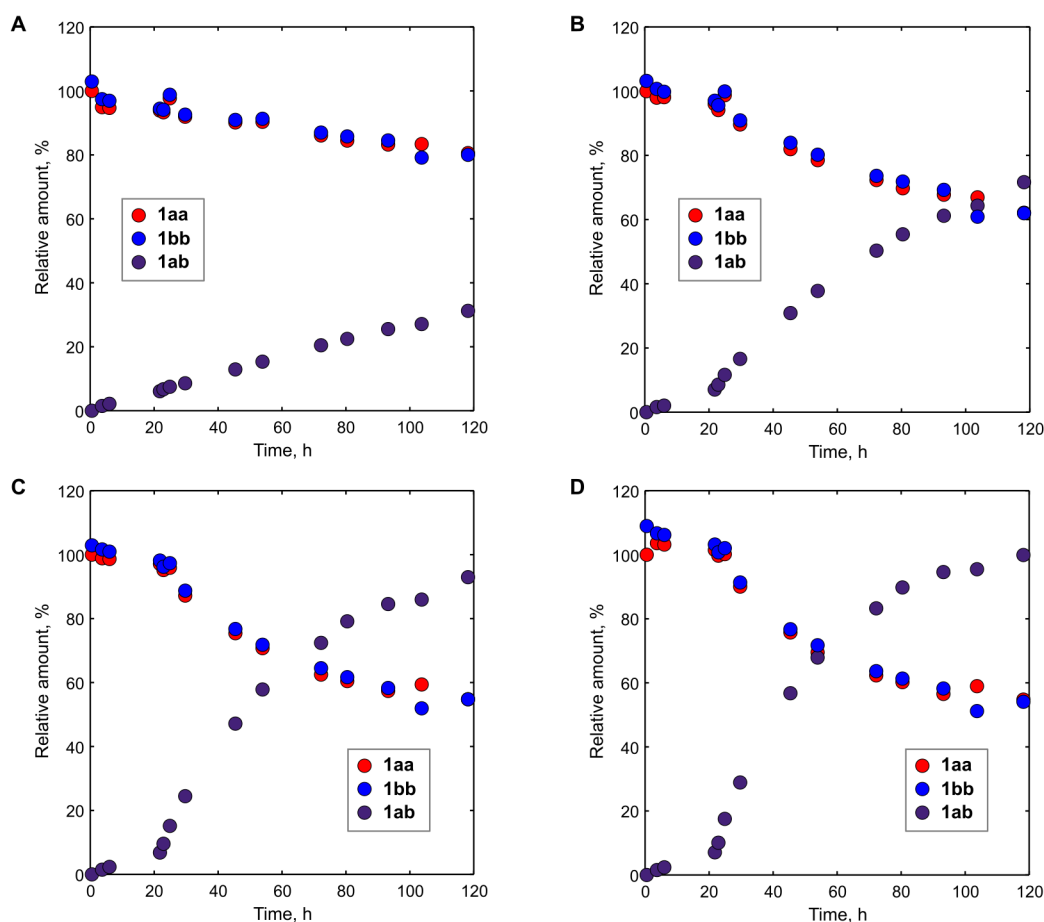

**Figure S16:** Kinetic plots of the amidinium metathesis between **1aa** and **1bb** in the presence of 4 mol% **BnNH<sub>2</sub>** and varying amounts of NBu<sub>4</sub>OAc: A) 0 mol%; B) 20 mol%; C) 50 mol%; D) 90 mol% (all relative quantities are with respect to the total amount of the amidinium species). The acetate was added after 22 h from the reaction start. Reaction conditions: 1.0 eq. **1aa** (10 μmol), 1.0 eq. **1bb** (10 μmol), 0.075 eq. **BnNH<sub>2</sub>** (0.75 μmol), 0–1.8 eq. NBu<sub>4</sub>OAc (0–18 μmol), solvent – MeCN (total volume – 400 μL), r.t.

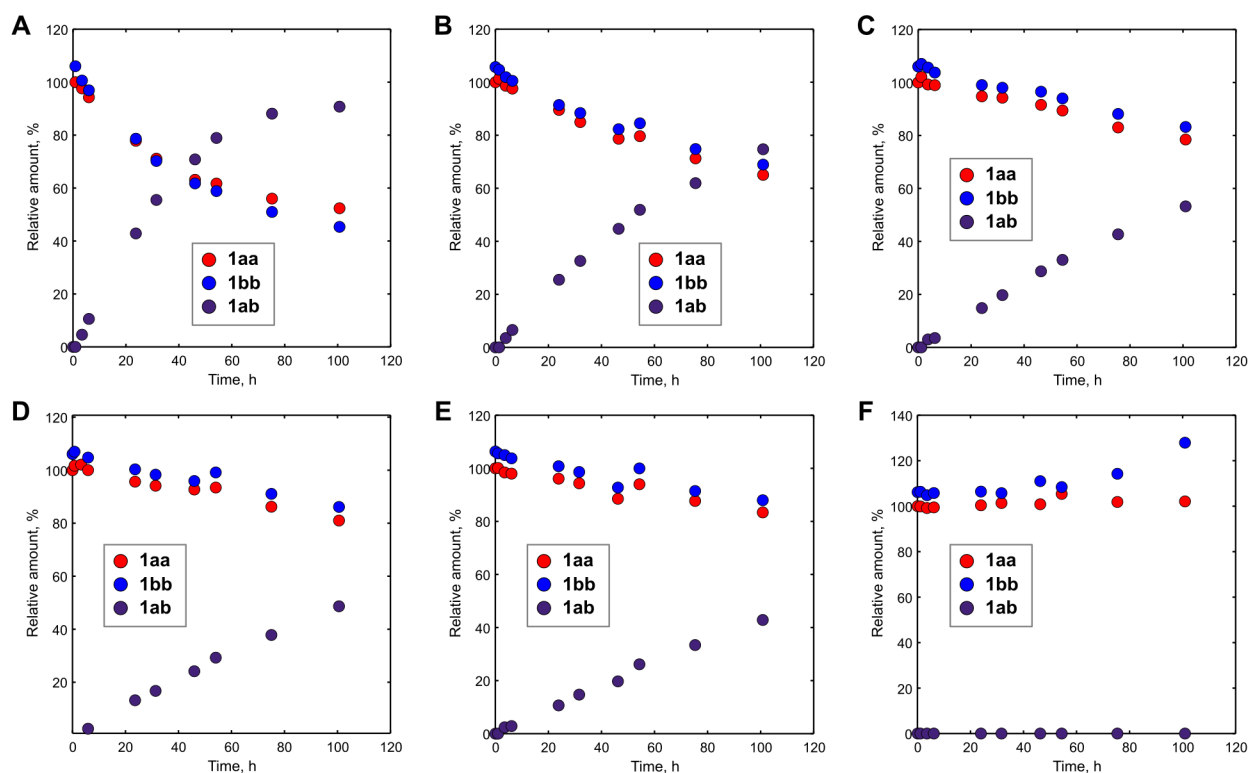

**Figure S17:** Kinetic plots of the amidinium metathesis between **1aa** and **1bb** in the presence of 5 mol% **BnNH<sub>2</sub>** and different anions (as  $\text{NBu}_4^+$  salts, 100 mol%): A)  $\text{H}_2\text{PO}_4^-$ ; B)  $\text{Cl}^-$ ; C)  $\text{I}^-$ ; D)  $\text{PF}_6^-$ ; E)  $\text{NO}_3^-$ ; F)  $\text{HSO}_4^-$  (all relative quantities are with respect to the total amount of the amidinium species). Reaction conditions: 1.0 eq. **1aa** (10  $\mu\text{mol}$ ), 1.0 eq. **1bb** (10  $\mu\text{mol}$ ), 0.1 eq. **BnNH<sub>2</sub>** (1  $\mu\text{mol}$ ), 2.0 eq.  $\text{NBu}_4^+$  salt (20  $\mu\text{mol}$ ), solvent – MeCN (total volume – 400  $\mu\text{L}$ ), r.t. In case of metatheses in the presence of  $\text{H}_2\text{PO}_4^-$  (A) and  $\text{Cl}^-$  (B), the solvent contained 20% and 10% (v/v) MeOH respectively (to increase solubility of the amidinium salts).



**Table S3:** Half-lives of the metathesis between **1aa** and **1bb** in the presence of different anions and substoichiometric amounts of **BnNH<sub>2</sub>** (combined data from Figures S13, S14 and S17).

| Entry | Anion                                       | BnNH <sub>2</sub> , mol% | t <sub>1/2</sub> , min <sup>a</sup> |
|-------|---------------------------------------------|--------------------------|-------------------------------------|
| 1     | BPh <sub>4</sub> <sup>-</sup>               | 0                        | ∞                                   |
| 2     | AcO <sup>-</sup>                            | 0                        | 70                                  |
| 3     | BPh <sub>4</sub> <sup>-</sup>               | 2.5                      | >330 <sup>b</sup>                   |
| 4     | AcO <sup>-</sup>                            | 2.5                      | 27                                  |
| 5     | BPh <sub>4</sub> <sup>-</sup>               | 5                        | 102                                 |
| 6     | AcO <sup>-</sup>                            | 5                        | 16                                  |
| 7     | BPh <sub>4</sub> <sup>-</sup>               | 10                       | 32                                  |
| 8     | AcO <sup>-</sup>                            | 10                       | 9                                   |
| 9     | H <sub>2</sub> PO <sub>4</sub> <sup>-</sup> | 5                        | 28                                  |
| 10    | Cl <sup>-</sup>                             | 5                        | 54                                  |
| 11    | I <sup>-</sup>                              | 5                        | 92                                  |
| 12    | PF <sub>6</sub> <sup>-</sup>                | 5                        | 100                                 |
| 13    | NO <sub>3</sub> <sup>-</sup>                | 5                        | 114                                 |
| 14    | HSO <sub>4</sub> <sup>-</sup>               | 5                        | ∞                                   |

<sup>a</sup> The time when the amount of metathesis product **1ab** reaches 50% from its equilibrium amount.

<sup>b</sup> The value was obtained by linear extrapolation of the obtained experimental data (linear extrapolation underestimates the actual reaction half-life).

## 5 NMR spectra

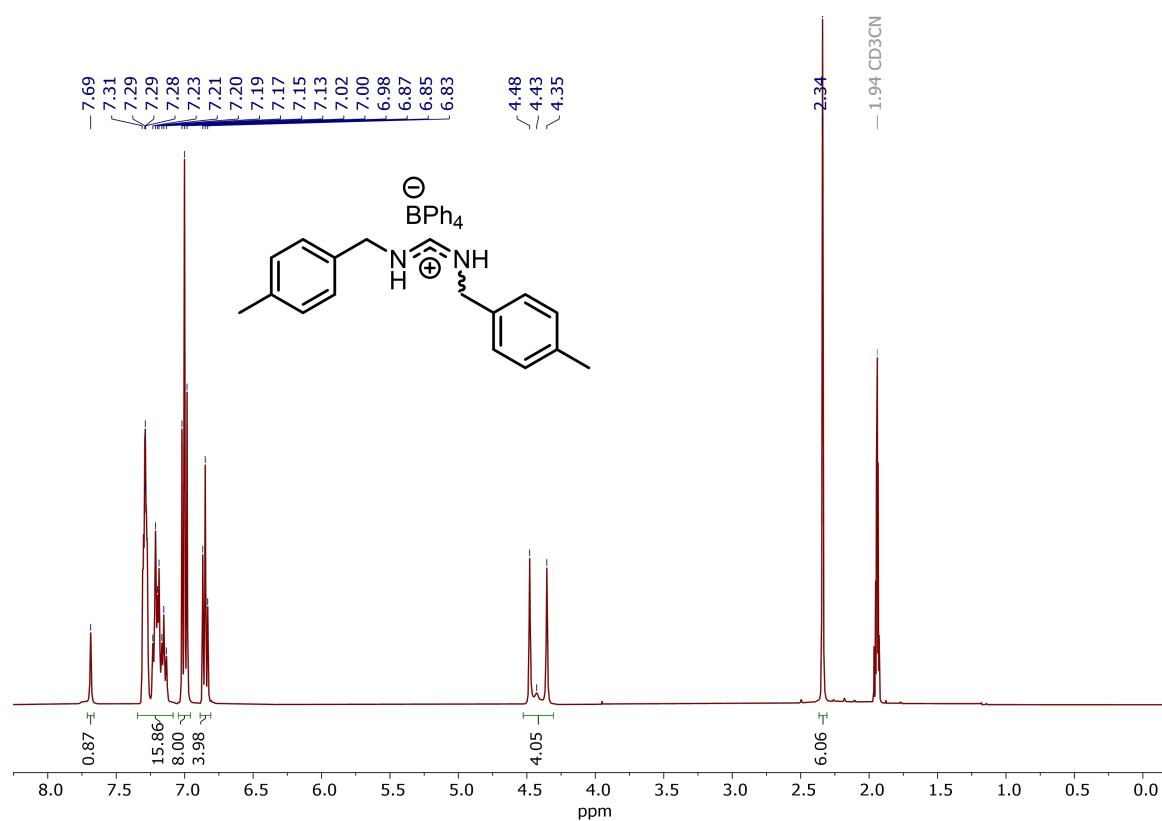

Figure S18:  $^1\text{H}$  NMR spectrum (400 MHz,  $\text{CD}_3\text{CN}$ , 295 K) of  $1\text{bb}\cdot\text{BPh}_4$ .

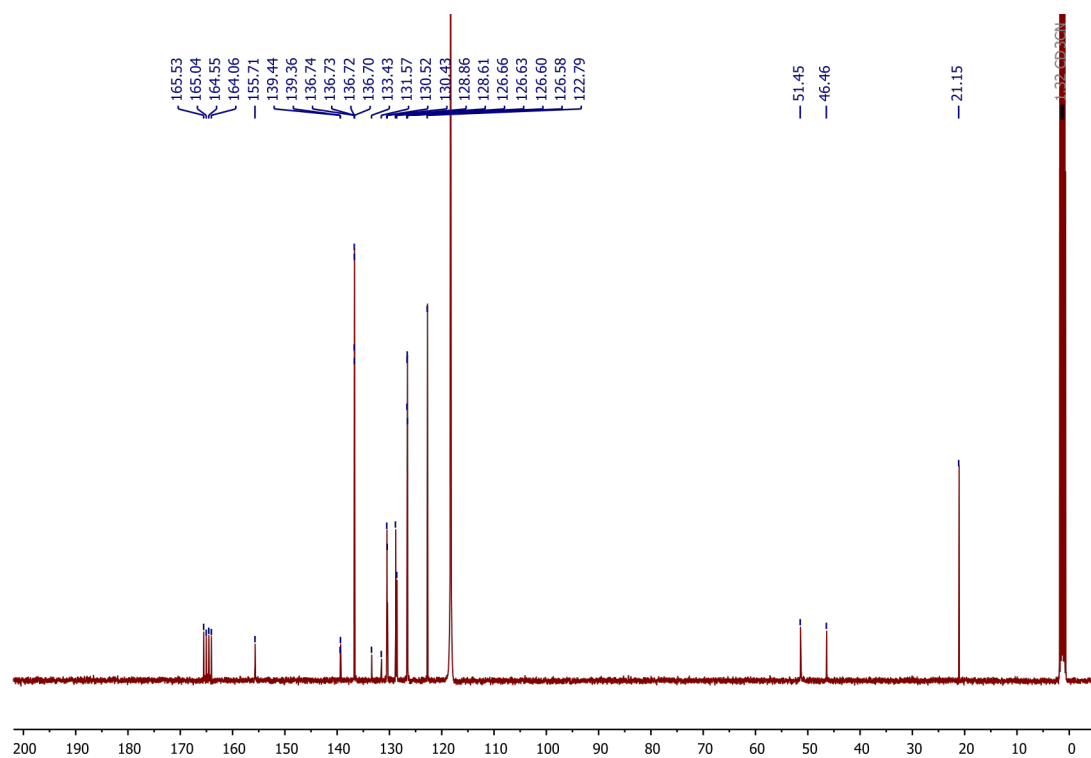

Figure S19:  $^{13}\text{C}$  NMR spectrum (101 MHz,  $\text{CD}_3\text{CN}$ , 298 K) of  $1\text{bb}\cdot\text{BPh}_4$ .

## References

- [1] O. Borodin, Y. Shchukin, C. C. Robertson, S. Richter, M. von Delius, *J. Am. Chem. Soc.* **2021**, *143*, PMID: 34559523, 16448–16457, DOI [10.1021/jacs.1c05230](https://doi.org/10.1021/jacs.1c05230).
